# Supplementary material
Source: Royal Society of Chemistry journal article supplement (doi:10.1039/d6nr00840b)
Supplement: d6nr00840b1.pdf [file d6nr00840b1.pdf]

## Supplementary Material

### Bimetal Chalcogenides $\text{TM}_2\text{TM}'\text{X}_4$ Monolayer: Stable Room Temperature Ferromagnetic Semiconductors

Xinyue Ren,<sup>1</sup> Yuqing Mao,<sup>1</sup> Yiru Tang,<sup>1</sup> Lijuan Meng,<sup>2</sup> Xiuyun Zhang<sup>1\*</sup>

<sup>1</sup>College of Physics Science and Technology, Yangzhou University, Yangzhou 225002, China.

<sup>2</sup>Jiangsu vocational college Jiangsu Vocat Coll Elect & Informat, Sch Elect Engn, Huaian 223003, Peoples R China

\*Authors to whom correspondence should be addressed: sunyi@jsei.edu.cn; xyzhang@yzu.edu.cn

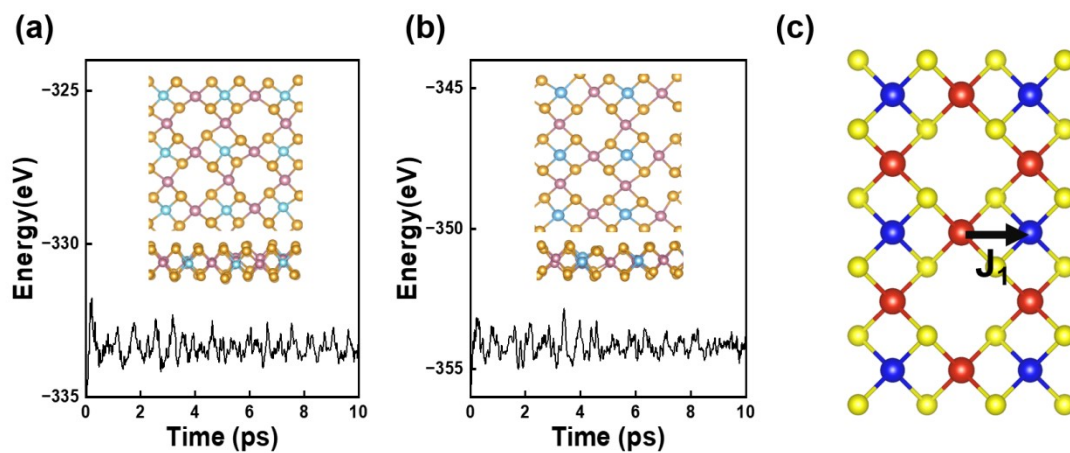

**Fig. S1** AIMD snapshots (top and side views) of  $\text{V}_2\text{NiTe}_4$  (a) and  $\text{V}_2\text{NiTe}_4$  (b) monolayers. (c) Schematic diagram of exchange interaction.

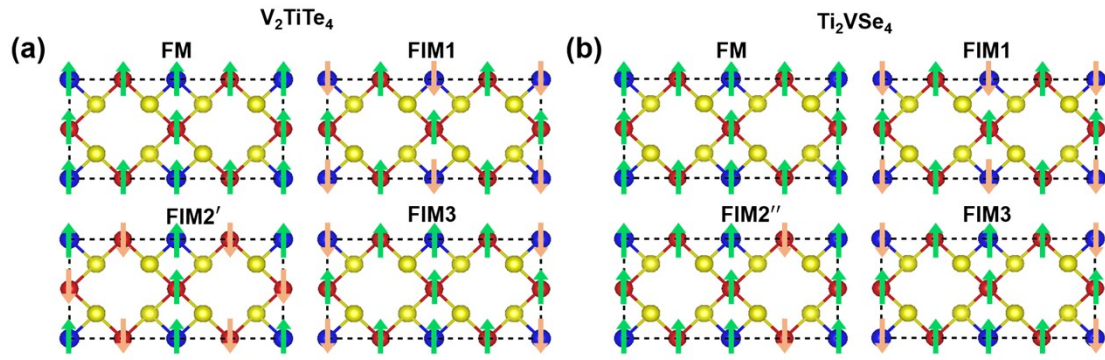

**Fig. S2** Considered magnetic configurations for  $V_2TiTe_4$  (a) and  $Ti_2VSe_4$  (b) monolayers.

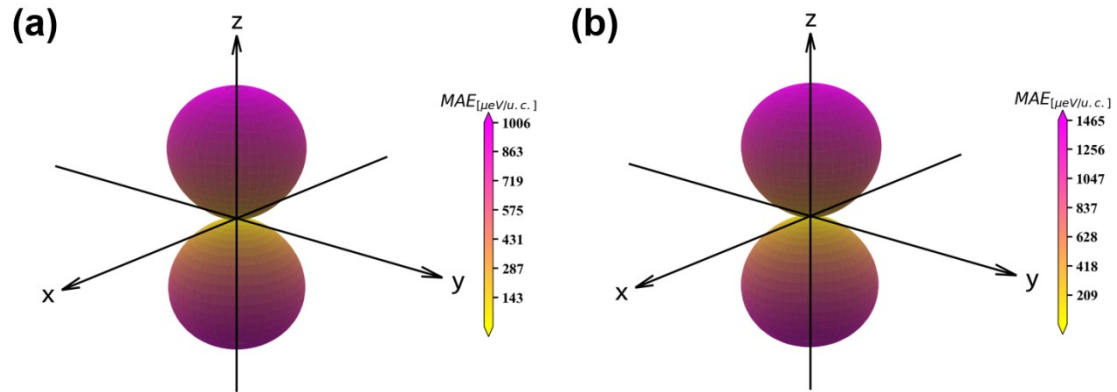

**Fig. S3** The calculated MAEs of  $V_2TiTe_4$  (a) and  $Ti_2VSe_4$  (b) monolayers.

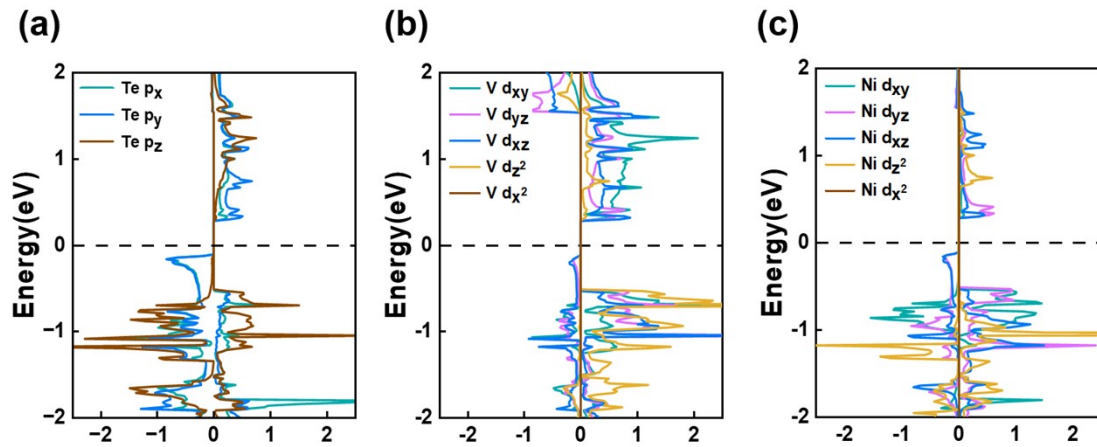

**Fig. S4** Projected density of states (PDOS) for Te- $p$  (a), V- $d$  (b) and Ni- $d$  (c) orbitals in the  $V_2NiTe_4$  monolayer.

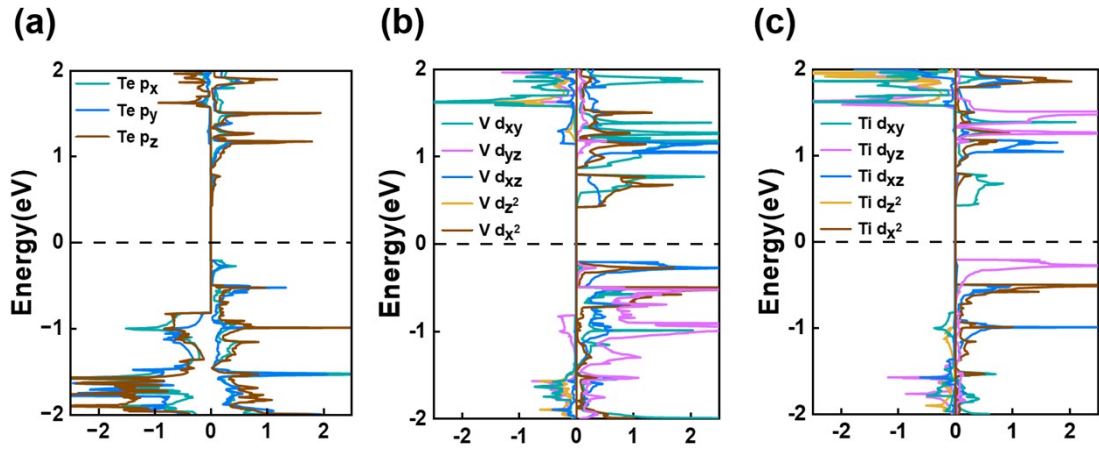

**Fig. S5** Projected density of states (PDOS) for Te-*p* (a), V-*d* (b) and Ti-*d* (c) orbitals in the  $V_2TiTe_4$  monolayer.

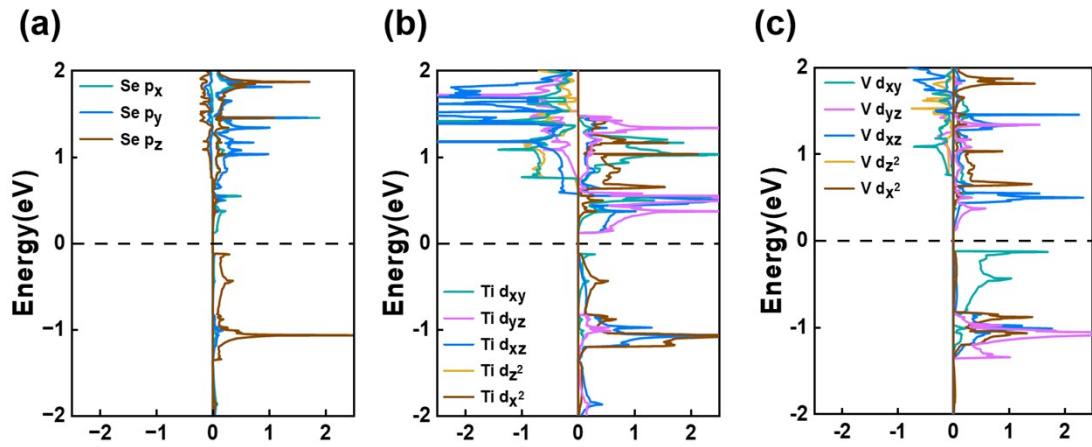

**Fig. S6** Projected density of states (PDOS) for Se-*p* (a), Ti-*d* (b), and V-*d* (c) orbitals in the  $Ti_2VSe_4$  monolayer.

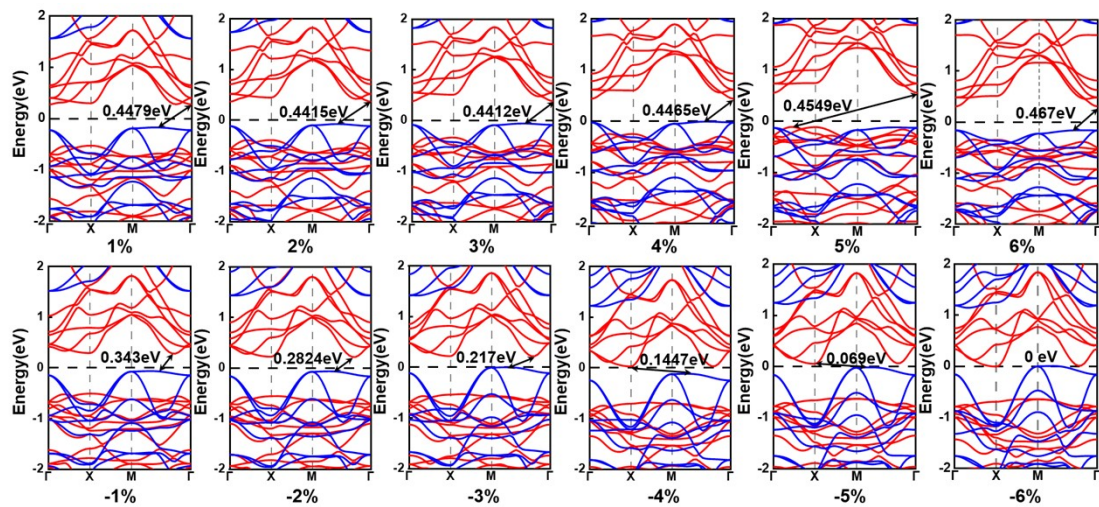

**Fig. S7** Band structures of  $V_2NiTe_4$  monolayer under tensile and compressive strains

from -6% to 6%.

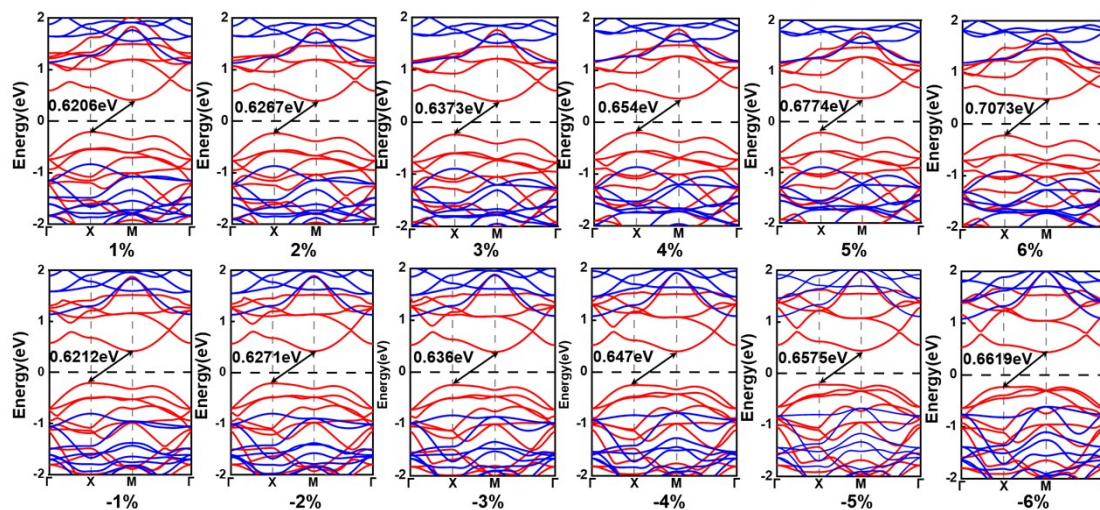

**Fig. S8** Band structures of  $V_2TiTe_4$  monolayer under tensile and compressive strains from -6% to 6%.

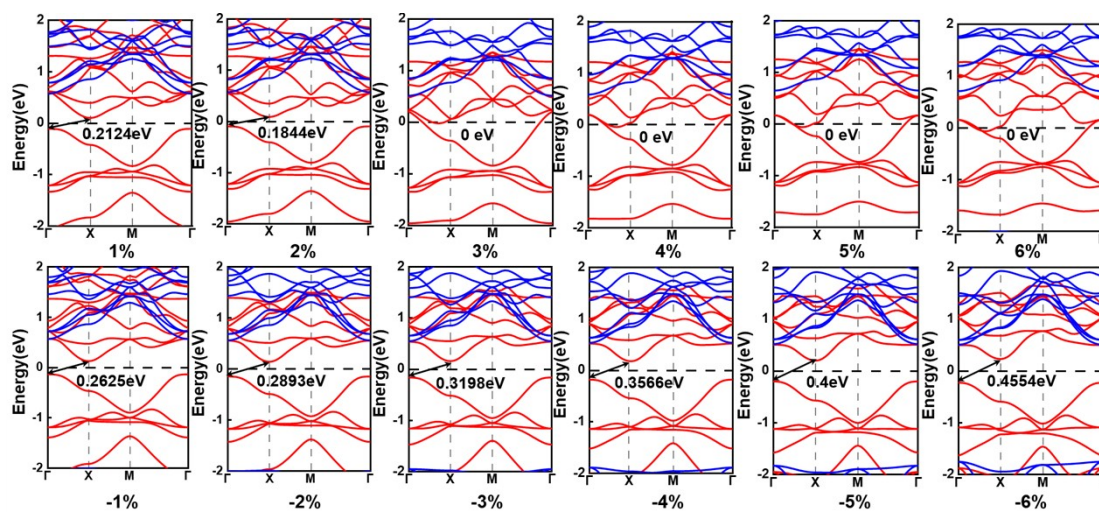

**Fig. S9** Band structures of  $Ti_2VSe_4$  monolayer under tensile and compressive strains from -6% to 6%.
